# Supplementary material for: ROS Accumulation by PEITC Selectively Kills Ovarian Cancer Cells via UPR-Mediated Apoptosis
Source: PubMed Central journal article supplement (PMC4517521; doi:10.3389/fonc.2015.00167), 2015-07-28
Supplement: image_1.pdf [file image_1.pdf]

## Supplementary Material

# ROS accumulation by PEITC selectively kills ovarian cancer cells via UPR-mediated apoptosis

Yoon-hee Hong<sup>1,2</sup>, Md. Hafiz Uddin<sup>1</sup>, Untek Jo<sup>1</sup>, Boyun Kim<sup>1,2</sup>, Jiyoung Song<sup>1,2</sup>, Dong Hoon Suh<sup>3</sup>, Hee Seung Kim<sup>4</sup> and Yong Sang Song<sup>1,2,4\*</sup>

<sup>1</sup>Gynecological Oncology Laboratory, Cancer Research Institute, Seoul National University College of Medicine, Seoul, Korea

<sup>2</sup>WCU Biomodulation, Department of Agricultural Biotechnology, Seoul National University, Seoul, Korea

<sup>3</sup>Department of Obstetrics and Gynecology, Seoul National University Bundang Hospital, Seongnam, Korea,

<sup>4</sup>Department of Obstetrics and Gynecology, Seoul National University College of Medicine, Seoul, Korea

\* **Correspondence:** Yong Sang Song, MD, PhD, Department of Obstetrics and Gynecology, Seoul National University Hospital, Yongon-dong, Jongno-gu, Seoul 110-744, Korea, Tel: +822-2072-2822 Fax: +822-762-3599, Email: [yssong@snu.ac.kr](mailto:yssong@snu.ac.kr)

**Keywords:** unfolded protein response,  $\beta$ -phenethyl isothiocyanate, ovarian cancer, reactive oxygen species, apoptosis.

## 1. Supplementary Figures and Tables

### 1.1. Supplementary Figures

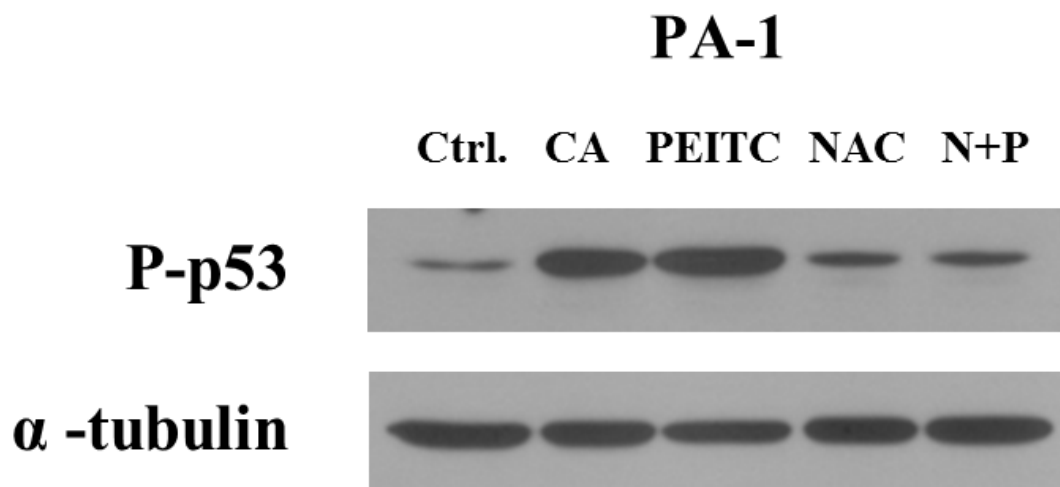

**Supplementary Figure 1.** PA-1 was incubated with a vehicle, 20  $\mu$ M cinnamaldehyde (CA), 5  $\mu$ M of PEITC, 10 mM NAC, and NAC with PEITC for 24 h, respectively. NAC was pretreated for 1 h and co-treated with PEITC for 24 h. Cinnamaldehyde was used as a positive control for checking the activation of p53. Western blotting was performed to detect activation of p53 (P-p53, phosphorylated at Ser15). p53 was activated by PEITC, and attenuated by NAC treatment.
